# Supplementary material for: Enterovirus A71 does not meet the uncoating receptor SCARB2 at the cell surface
Source: PubMed Central journal article supplement (PMC10901359; doi:10.1371/journal.ppat.1012022), 2024-02-15
Supplement: ppat.1012022.s011.pdf [file ppat.1012022.s011.pdf]

**S1 Table. Primers for PCR amplification.**

| Construct               | S/A <sup>1)</sup> | Site         | Sequence (5'-3') <sup>2)</sup>                                        |
|-------------------------|-------------------|--------------|-----------------------------------------------------------------------|
| EGFP, mCherry           | S                 | <i>NheI</i>  | tata <u>gctagcc</u> ggtccggaggtggaggtccaccATGGTGAGCAAGGGCGAGGA        |
|                         | A                 | <i>MluI</i>  | tata <u>acgcg</u> ttaCTTGTACAGCTCGTCCA                                |
| Blasticidin S deaminase | S                 | <i>XbaI</i>  | <u>tctag</u> accATGGCCAAGCCTTTGTC                                     |
|                         | A                 | <i>NotI</i>  | <u>gcggccg</u> cttaGCCCTCCCACACATAAC                                  |
|                         | S                 | <i>CpoI</i>  | tat <u>cggtccg</u> ccATGGCCAAGCCTTTGTCTCA                             |
|                         | A                 | <i>CpoI</i>  | tat <u>cggaccg</u> ttaGCCCTCCCACACATAAC                               |
| PSGL-1                  | S                 | <i>CpoI</i>  | tat <u>cggtccg</u> ataaatATGCCTCTGCAACTCCTCC                          |
|                         | A                 | <i>CpoI</i>  | ta <u>gggaccg</u> ctaAGGGAGGAAGCTGTGCA                                |
| SCARB2                  | S                 | <i>CpoI</i>  | tat <u>cggtccg</u> ataaatATGGGCCGATGCTGCTTCT                          |
|                         | A                 | <i>CpoI</i>  | ta <u>cggaccg</u> ttaGGTTCGAATGAGGGGTG (with a stop codon)            |
|                         | A                 | <i>CpoI</i>  | ac <u>ccggaccg</u> GGTTCGAATGAGGGGTGCTC (without a stop codon)        |
| EV-A71-SK-EV006         | S                 | <i>BamHI</i> | tt <u>agatc</u> ctaatacgaactcactataggttaaacagcctgtgggtgcacccac        |
|                         | A                 | <i>StuI</i>  | aaa <u>ggcct</u> tttttttttttttttttttttttctattctggtataacaaattaccccccac |

<sup>1)</sup>S, sense; A, antisense

<sup>2)</sup>Restriction endonuclease recognition sites are underlined. Nucleotides corresponding to the open reading frame are indicated by uppercase letters. The T7 promoter sequence is indicated by italics.
