# Supplementary material for: Enterovirus A71 does not meet the uncoating receptor SCARB2 at the cell surface
Source: PubMed Central journal article supplement (PMC10901359; doi:10.1371/journal.ppat.1012022), 2024-02-15
Supplement: ppat.1012022.s012.pdf [file ppat.1012022.s012.pdf]

**S2 Table. Primers for substitution.**

| Substitution | S/A <sup>1)</sup> | Sequence (5'-3') <sup>2)</sup>                                           |
|--------------|-------------------|--------------------------------------------------------------------------|
| SCARB2 N68Q  | S                 | ctattcttcCaAgtcaccaatccagaggagat                                         |
|              | A                 | gattggtgacTtGgaagaaatagaactgagtat                                        |
| SCARB2 N325Q | S                 | aggagtctgCaAgtcagcatctgcaagaatgg                                         |
|              | A                 | agatgctgacTtGcagaactcctgagcccaggc                                        |
| SCARB2 I476G | A                 | ta <u>aggaccgttaggttcga</u> CCgaggggtgctctttcatccg ( <i>CpoI</i> )       |
| Cas9 N497A   | S                 | gatgaccGCcttcgataagaacctgcc                                              |
|              | A                 | atcgaagGCggtcatccgctcgatgaagc                                            |
| Cas9 R661A   | S                 | ctggggcGCCctgagccggaagctgat                                              |
|              | A                 | ggctcagGGCgccccagccggtgtatctcc                                           |
| Cas9 Q695A   | S                 | cttcatgGCCctgatccacgacgacagcct                                           |
|              | A                 | ggatcagGGCcatgaagtttctgttgccga                                           |
| Cas9 Q926A   | A                 | caggatctgt <u>ccactgtctttgtgat</u> GGCccgggttccaccagctgc ( <i>PmlI</i> ) |

<sup>1)</sup>S, sense; A, antisense.

<sup>2)</sup>Substituted nucleotides are indicated by uppercase letters. The restriction endonuclease recognition sites for cloning are underlined and indicated in parentheses
