# Supplementary material for: Enterovirus A71 does not meet the uncoating receptor SCARB2 at the cell surface
Source: PubMed Central journal article supplement (PMC10901359; doi:10.1371/journal.ppat.1012022), 2024-02-15
Supplement: ppat.1012022.s013.pdf [file ppat.1012022.s013.pdf]

**S3 Table. Plasmids and oligos for genome editing by CRISPR/Cas9.**

| Plasmid           | Target gene <sup>1)</sup> | S/A <sup>2)</sup> | Sequence (5'-3') <sup>3)</sup> |
|-------------------|---------------------------|-------------------|--------------------------------|
| PX459v2HF1-PSGL-1 | <i>SELPLG</i> (131-150)   | S                 | aaacCCGAATATGAGTACCTAGAT       |
|                   |                           | A                 | caccATCTAGGTACTCATATTCGG       |
| PX459v2HF1-SCARB2 | <i>SCARB2</i> (6-25)      | S                 | caccCCGATGCTGCTTCTACACGG       |
|                   |                           | A                 | aaacCCGTGTAGAAGCAGCATCGG       |

<sup>1)</sup>The nucleotide positions corresponding to the open reading frame are indicated in parentheses.

<sup>2)</sup>S, sense; A, antisense.

<sup>3)</sup>Nucleotides used for cloning into the *BbsI* site of PX459v2HF1 are indicated by lowercase letters. Nucleotides corresponding to the genome are indicated by uppercase letters.
