# Supplementary material for: Enterovirus A71 does not meet the uncoating receptor SCARB2 at the cell surface
Source: PubMed Central journal article supplement (PMC10901359; doi:10.1371/journal.ppat.1012022), 2024-02-15
Supplement: ppat.1012022.s014.pdf [file ppat.1012022.s014.pdf]

# Sample : Jurkat (P3, 1/11/2022)

GeneMapper Software 5

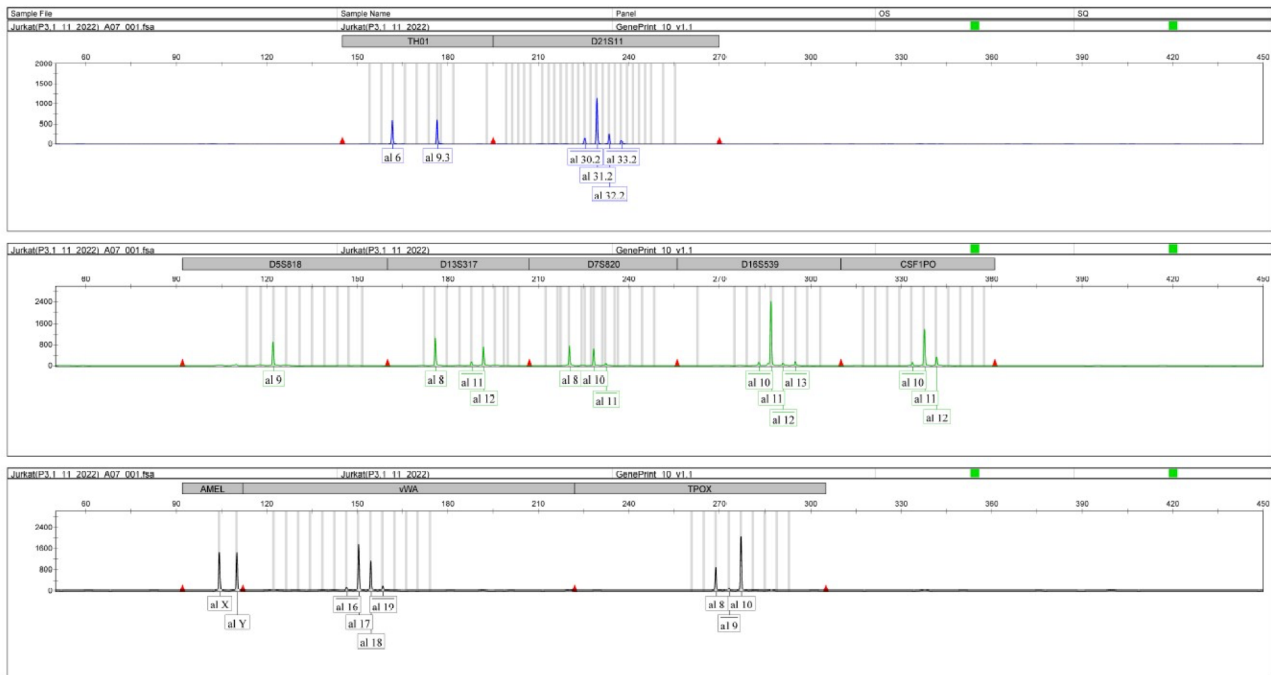

## STR Profile

| Locus   | Jurkat (P3, 1/11/2022) |      |      |      |
|---------|------------------------|------|------|------|
| TH01    | 6                      | 9.3  |      |      |
| D21S11  | 30.2                   | 31.2 | 32.2 | 33.2 |
| D5S818  | 9                      |      |      |      |
| D13S317 | 8                      | 11   | 12   |      |
| D7S820  | 8                      | 10   | 11   |      |
| D16S539 | 10                     | 11   | 12   | 13   |
| CSF1PO  | 10                     | 11   | 12   |      |
| AMEL    | X                      | Y    |      |      |
| vWA     | 16                     | 17   | 18   | 19   |
| TPOX    | 8                      | 9    | 10   |      |

| Jurkat (CVCL_0065) |      |      |    |
|--------------------|------|------|----|
|                    | 6    | 9.3  |    |
|                    | 31.2 | 32.2 |    |
|                    | 9    |      |    |
|                    | 8    | 11   | 12 |
|                    | 8    | 10   | 11 |
|                    | 11   |      |    |
|                    | 11   |      |    |
|                    | X    | Y    |    |
|                    | 16   | 17   | 18 |
|                    | 8    | 10   |    |

STR profiles of Jurkat (P3, 1/11/2022) were not completely matched with Jurkat (CVCL\_0065). But Evaluation value (EV) between Jurkat (P3, 1/11/2022) and Jurkat (CVCL\_0065) was 0.82, which was high enough that STR profiles of Jurkat (P3, 1/11/2022) are the same as those of Jurkat (CVCL\_0065). Therefore two cell lines were considered to be the identical cell strain.

Sample : RD (P6, 9/4/2020)

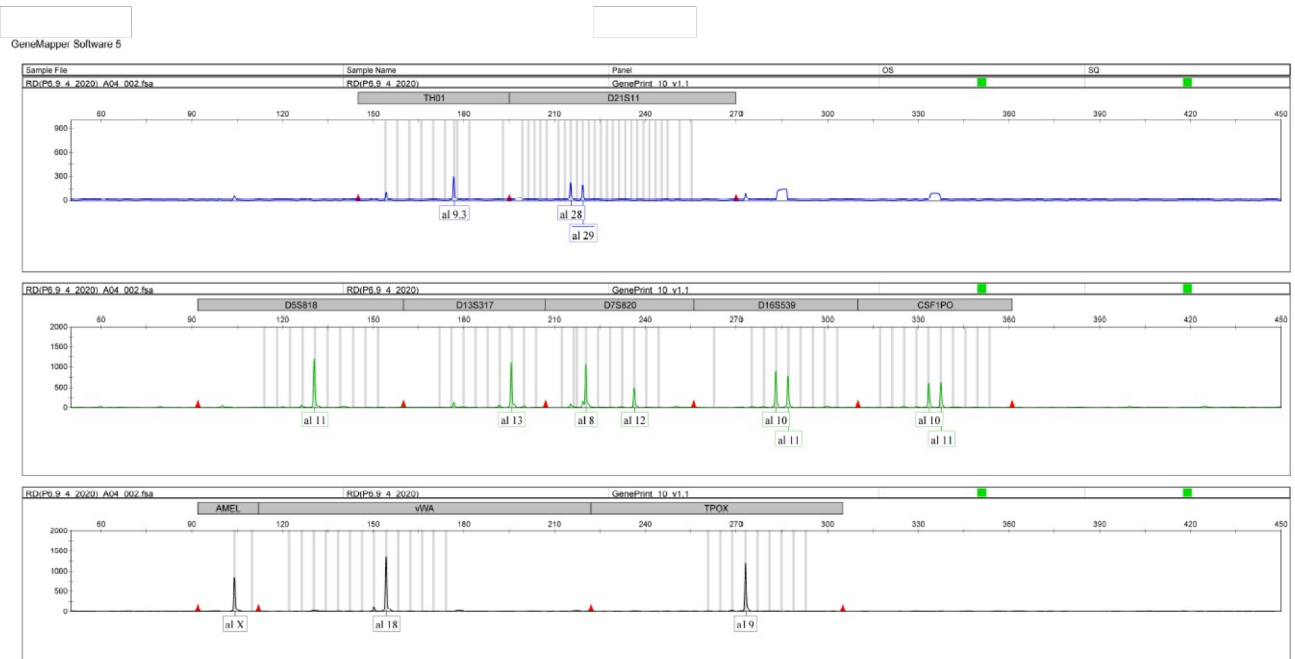

STR Profile

| Locus   | RD (P6, 9/4/2020) |    | RD (ATCC CCL-136) |    |
|---------|-------------------|----|-------------------|----|
| TH01    | 9.3               |    | 9.3               |    |
| D21S11  | 28                | 29 | -                 | -  |
| D5S818  | 11                |    | 11                |    |
| D13S317 | 13                |    | 13                |    |
| D7S820  | 8                 | 12 | 8                 | 12 |
| D16S539 | 10                | 11 | 10                | 11 |
| CSF1PO  | 10                | 11 | 10                | 11 |
| AMEL    | X                 |    | X                 |    |
| vWA     | 18                |    | 18                |    |
| TPOX    | 9                 |    | 9                 |    |

STR profiles of RD (P6, 9/4/2020) and RD (ATCC CCL-136) were completely matched. It was verified that the cells analyzed were considered to be the same as the cells registered in ATCC by comparison with the database of ATCC.

Sample : RD (P15, 10/9/2020)

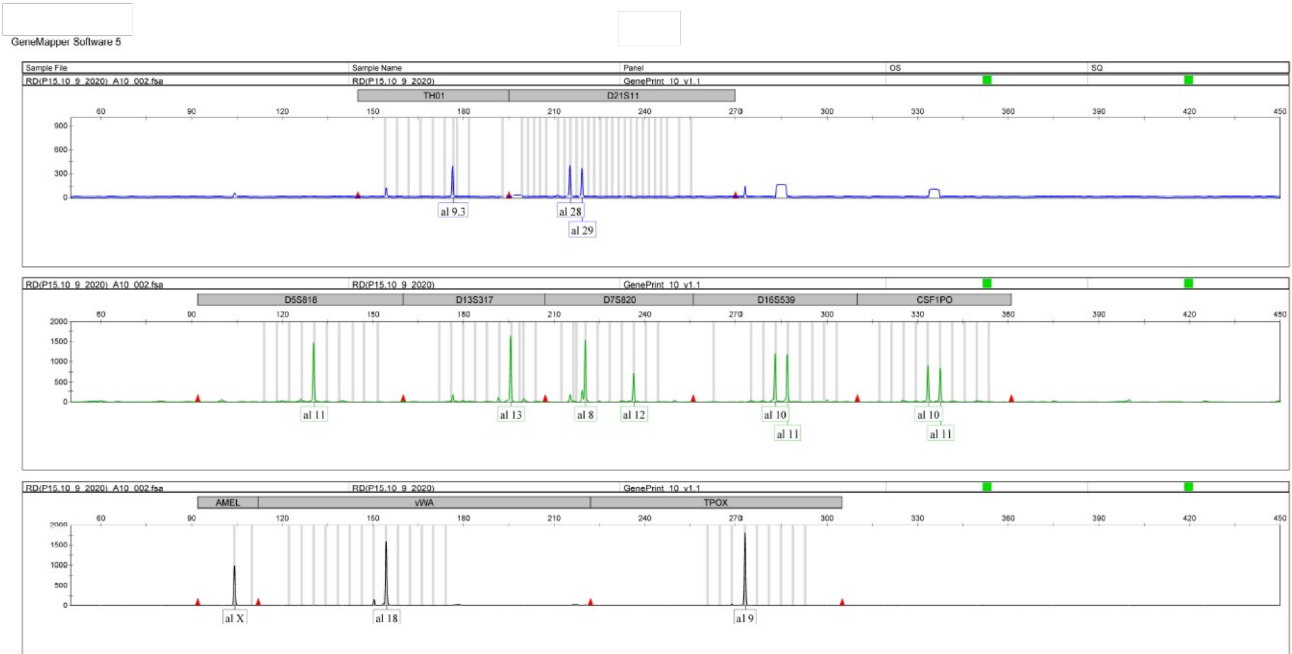

STR Profile

| Locus   | RD (P15,<br>10/9/2020) |    | RD (ATCC<br>CCL-136) |    |
|---------|------------------------|----|----------------------|----|
| TH01    | 9.3                    |    | 9.3                  |    |
| D21S11  | 28                     | 29 | -                    | -  |
| D5S818  | 11                     |    | 11                   |    |
| D13S317 | 13                     |    | 13                   |    |
| D7S820  | 8                      | 12 | 8                    | 12 |
| D16S539 | 10                     | 11 | 10                   | 11 |
| CSF1PO  | 10                     | 11 | 10                   | 11 |
| AMEL    | X                      |    | X                    |    |
| vWA     | 18                     |    | 18                   |    |
| TPOX    | 9                      |    | 9                    |    |

STR profiles of RD (P15, 10/9/2020) and RD (ATCC CCL-136) were completely matched. It was verified that the cells analyzed were considered to be the same as the cells registered in ATCC by comparison with the database of ATCC.

Sample : HeLa (P8, 9/16/2020)

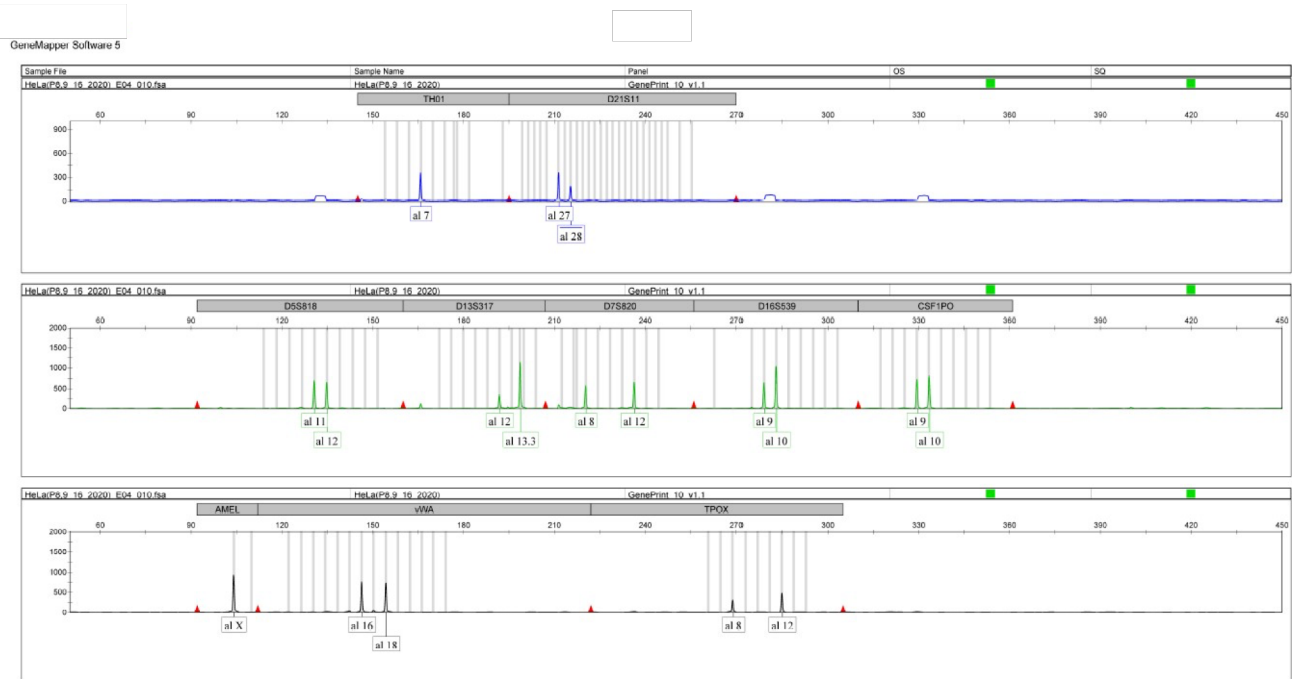

STR Profile

| Locus   | HeLa (P8, 9/16/2020) |      | HeLa (ATCC CRM-CCL-2) |      |
|---------|----------------------|------|-----------------------|------|
| TH01    | 7                    |      | 7                     |      |
| D21S11  | 27                   | 28   | -                     | -    |
| D5S818  | 11                   | 12   | 11                    | 12   |
| D13S317 | 12                   | 13.3 | 12                    | 13.3 |
| D7S820  | 8                    | 12   | 8                     | 12   |
| D16S539 | 9                    | 10   | 9                     | 10   |
| CSF1PO  | 9                    | 10   | 9                     | 10   |
| AMEL    | X                    |      | X                     |      |
| vWA     | 16                   | 18   | 16                    | 18   |
| TPOX    | 8                    | 12   | 8                     | 12   |

STR profiles of HeLa (P8, 9/16/2020) and HeLa (ATCC CRM-CCL-2) were completely matched. It was verified that the cells analyzed were considered to be the same as the cells registered in ATCC by comparison with the database of ATCC.

Sample : HEp-2 (P8, 9/16/2020)

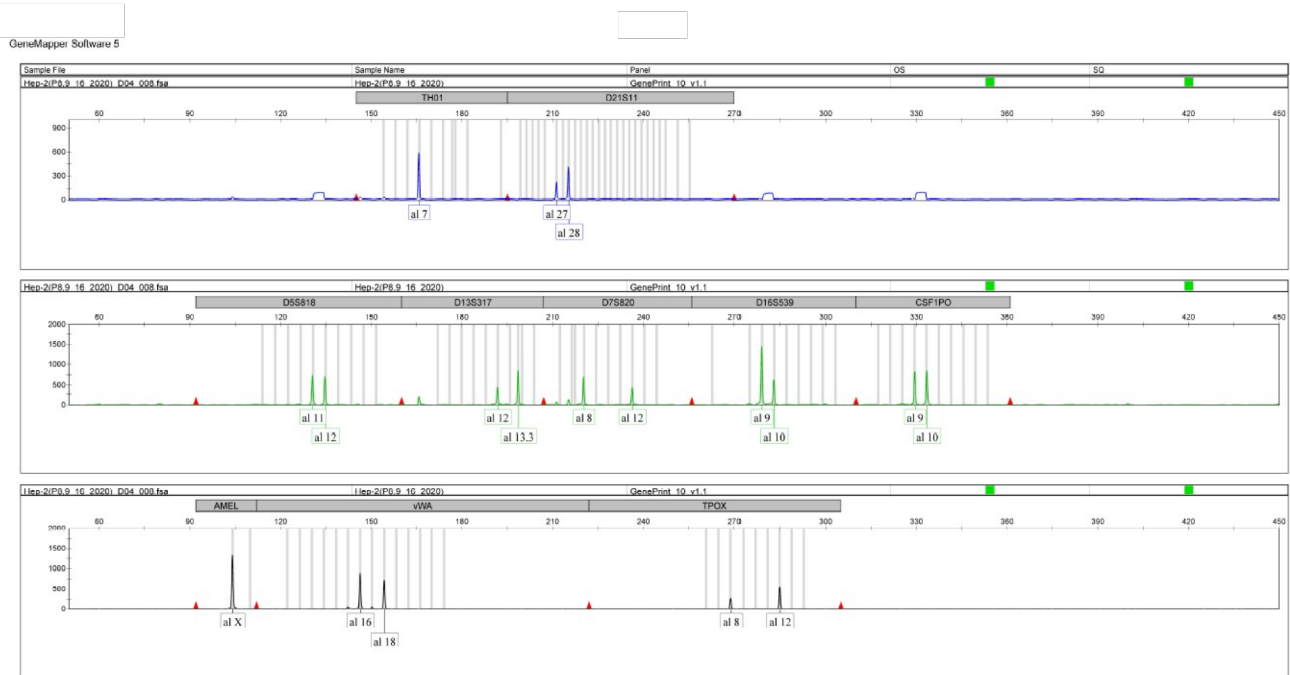

STR Profile

| Locus   | HEp-2 (P8, 9/16/2020) |      | HEp-2 (ATCC CCL-23) |      |
|---------|-----------------------|------|---------------------|------|
| TH01    | 7                     |      | 7                   |      |
| D21S11  | 27                    | 28   | -                   | -    |
| D5S818  | 11                    | 12   | 11                  | 12   |
| D13S317 | 12                    | 13.3 | 12                  | 13.3 |
| D7S820  | 8                     | 12   | 8                   | 12   |
| D16S539 | 9                     | 10   | 9                   | 10   |
| CSF1PO  | 9                     | 10   | 9                   | 10   |
| AMEL    | X                     |      | X                   |      |
| vWA     | 16                    | 18   | 16                  | 18   |
| TPOX    | 8                     | 12   | 8                   | 12   |

STR profiles of HEp-2 (P8, 9/16/2020) and HEp-2 (ATCC CCL-23) were completely matched. It was verified that the cells analyzed were considered to be the same as the cells registered in ATCC by comparison with the database of ATCC.

Sample : 293T (P5, 9/16/2020)

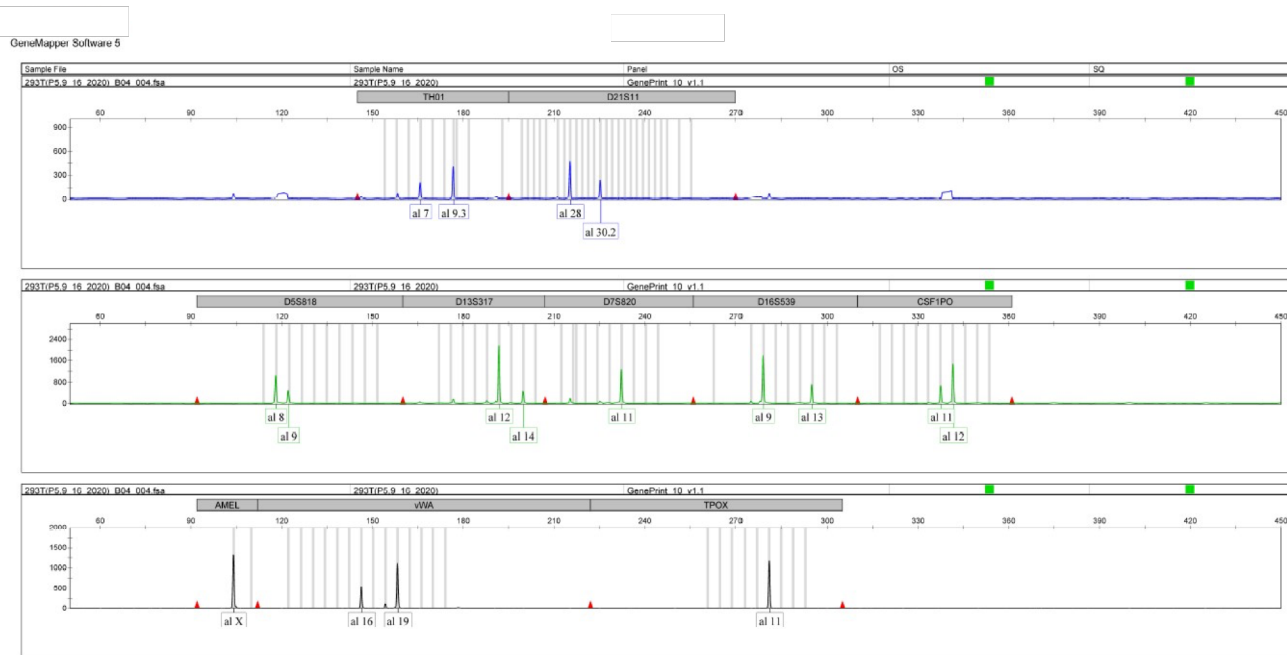

STR Profile

| Locus   | 293T (P5,<br>9/16/2020) |      | 293T (ATCC<br>CRL-3216) |     |
|---------|-------------------------|------|-------------------------|-----|
| TH01    | 7                       | 9.3  | 7                       | 9.3 |
| D21S11  | 28                      | 30.2 | -                       | -   |
| D5S818  | 8                       | 9    | 8                       | 9   |
| D13S317 | 12                      | 14   | 12                      | 14  |
| D7S820  | 11                      |      | 11                      |     |
| D16S539 | 9                       | 13   | 9                       | 13  |
| CSF1PO  | 11                      | 12   | 11                      | 12  |
| AMEL    | X                       |      | X                       |     |
| vWA     | 16                      | 19   | 16                      | 19  |
| TPOX    | 11                      |      | 11                      |     |

STR profiles of 293T (P5, 9/16/2020) and 293T (ATCC CRL-3216) were completely matched. It was verified that the cells analyzed were considered to be the same as the cells registered in ATCC by comparison with the database of ATCC.

# Sample : Hep G2 (P8, 9/16/2020)

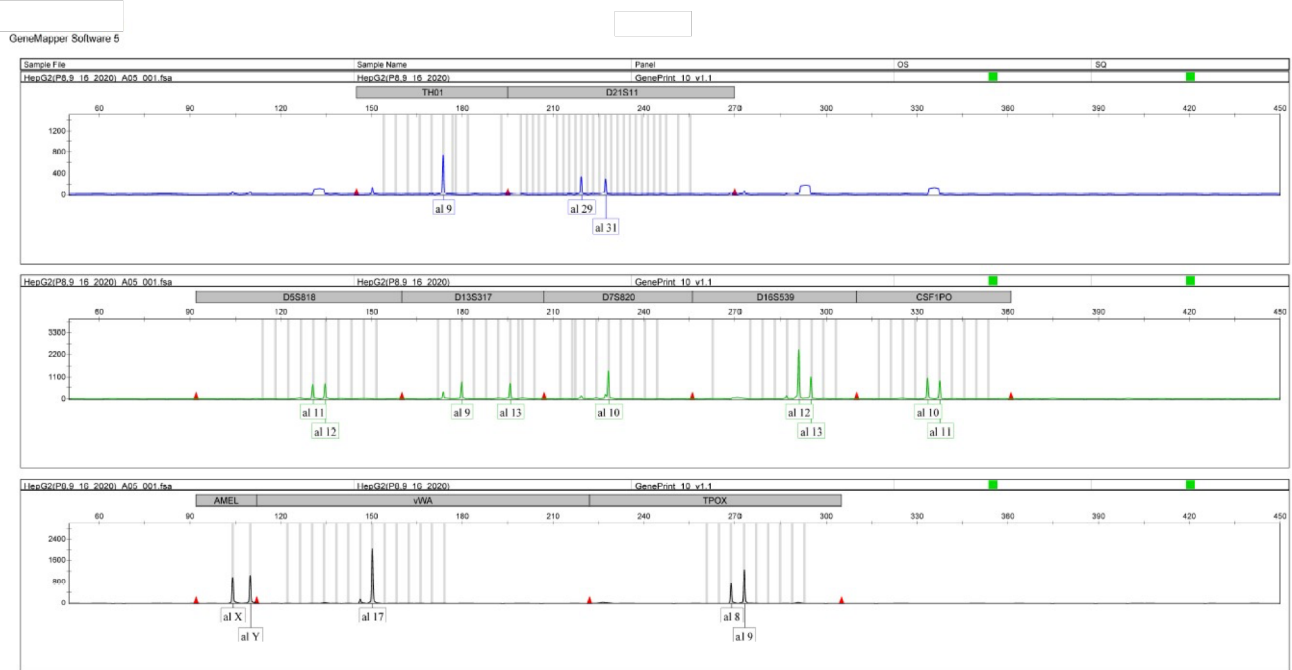

## STR Profile

| Locus   | Hep G2 (P8,<br>9/16/2020) |    | Hep G2 [HEPG2]<br>(ATCC HB-8065) |    |
|---------|---------------------------|----|----------------------------------|----|
| TH01    | 9                         |    | 9                                |    |
| D21S11  | 29                        | 31 | -                                | -  |
| D5S818  | 11                        | 12 | 11                               | 12 |
| D13S317 | 9                         | 13 | 9                                | 13 |
| D7S820  | 10                        |    | 10                               |    |
| D16S539 | 12                        | 13 | 12                               | 13 |
| CSF1PO  | 10                        | 11 | 10                               | 11 |
| AMEL    | X                         | Y  | X                                | Y  |
| vWA     | 17                        |    | 17                               |    |
| TPOX    | 8                         | 9  | 8                                | 9  |

STR profiles of Hep G2 (P8, 9/16/2020) and Hep G2 [HEPG2] (ATCC HB-8065) were completely matched. It was verified that the cells analyzed were considered to be the same as the cells registered in ATCC by comparison with the database of ATCC.

Sample : RD-A (P226+2+4, 10/28/2020)

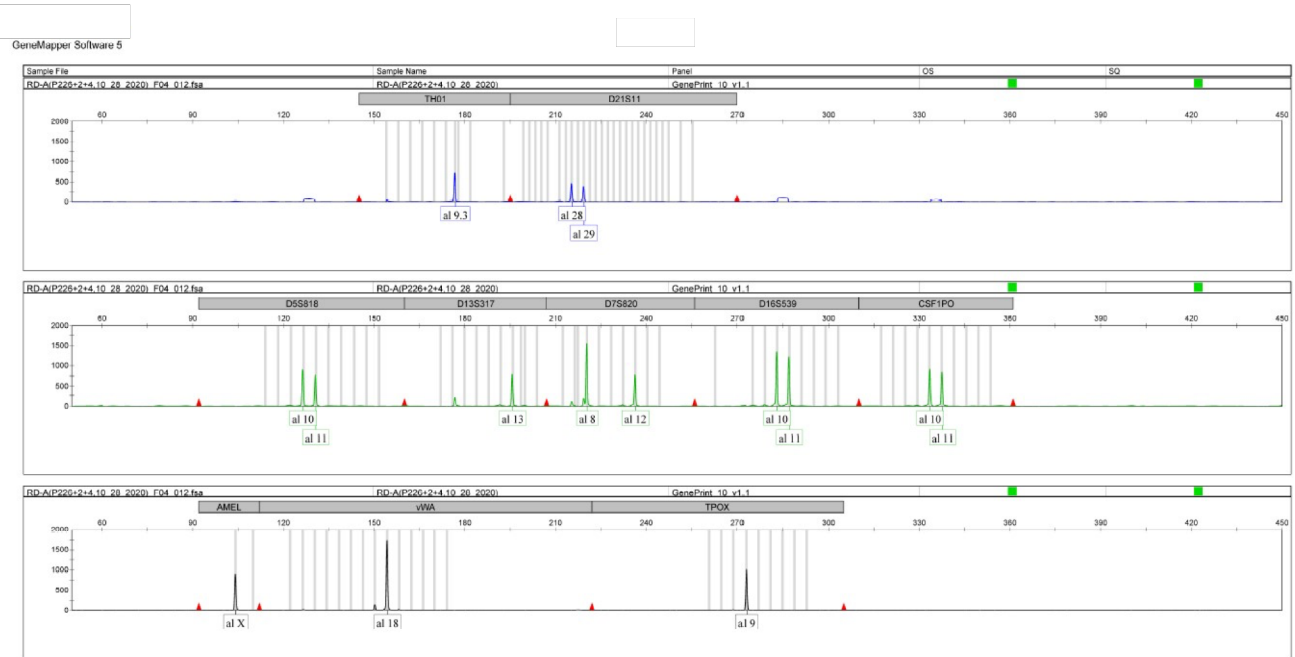

STR Profile

| Locus   | RD-A (P226+2+4,<br>10/28/2020) |    | RD (ATCC<br>CCL-136) |    |
|---------|--------------------------------|----|----------------------|----|
| TH01    | 9.3                            |    | 9.3                  |    |
| D21S11  | 28                             | 29 | -                    | -  |
| D5S818  | 10                             | 11 | 11                   |    |
| D13S317 | 13                             |    | 13                   |    |
| D7S820  | 8                              | 12 | 8                    | 12 |
| D16S539 | 10                             | 11 | 10                   | 11 |
| CSF1PO  | 10                             | 11 | 10                   | 11 |
| AMEL    | X                              |    | X                    |    |
| vWA     | 18                             |    | 18                   |    |
| TPOX    | 9                              |    | 9                    |    |

STR profiles of RD-A (P226+2+4, 10/28/2020) were not completely matched with RD (ATCC CCL-136). But Evaluation value (EV) between RD-A (P226+2+4, 10/28/2020) and RD (ATCC CCL-136) was 0.96, which was high enough that STR profiles of RD-A (P226+2+4, 10/28/2020) are the same as those of RD (ATCC CCL-136).

Therefore two cell lines were considered to be the identical cell strain.
